# Supplementary material for: Pathological Role of Phosphoglycerate Kinase 1 in Balloon Angioplasty-Induced Neointima Formation
Source: MDPI journal article supplement (doi:10.3390/ijms22168822), 2021-08-17
Supplement: s1 [file s1]

**The supplementary Material for**  
**Pathological Role of Phosphoglycerate Kinase 1 in Balloon Angioplasty-Induced**  
**Neointima Formation**

Chun-Hsu Pan<sup>1,2</sup>, Yi-Chung Chien<sup>3,4</sup>, Min-Shan Sung<sup>5</sup>, Hui-Yu Huang<sup>6</sup>, Ming-Jyh Sheu<sup>7</sup>,  
Chieh-Hsi Wu<sup>2,\*</sup>

<sup>1</sup> Ph.D. Program in Drug Discovery and Development Industry, College of Pharmacy, Taipei Medical University

<sup>2</sup> School of Pharmacy, Taipei Medical University, Taipei 11031, Taiwan

<sup>3</sup> Drug Development Center, Research Center for Cancer Biology, China Medical University, Taichung 40402, Taiwan

<sup>4</sup> Center for Molecular Medicine, China Medical University Hospital, Taichung 404332, Taiwan

<sup>5</sup> Graduate Institute of Basic Medical Science, China Medical University, Taichung 40402, Taiwan

<sup>6</sup> Graduate Institute of Metabolism and Obesity Sciences, Taipei Medical University, Taipei 11031, Taiwan

<sup>7</sup> School of Pharmacy, China Medical University, Taichung 40402, Taiwan

**\*Corresponding author:**

**Chieh-Hsi Wu, Ph.D.**

Professor and Vice President

School of Pharmacy, Taipei Medical University

No. 250, WuXing Street, Taipei 11031, Taiwan

Tel: +886-2-27361661 ext.2047

E-mail: chhswu@tmu.edu.tw

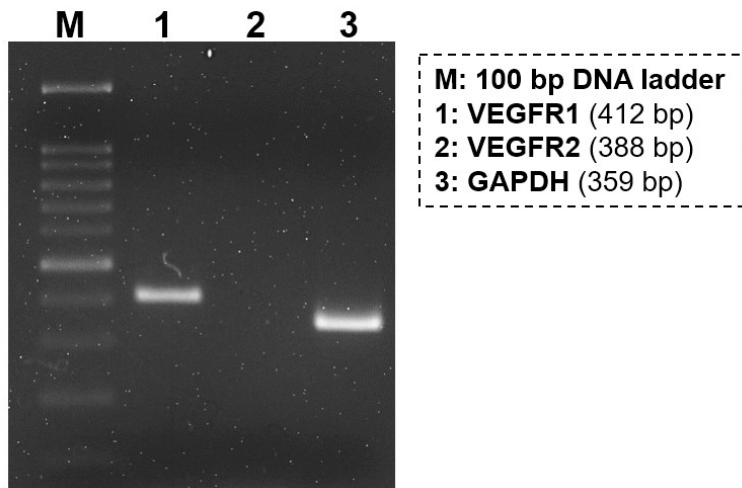

**Figure S1.** Detections of VEGFR1 and VEGFR2 transcripts in VSMCs by RT-PCR. Gene expression of VEGFR1 and VEGFR2 were examined using a ReverTra Ace set (TOYOBO) and an AptaTaq Fast PCR Master kit (Roche), respectively. Primer pairs were following: VEGFR1 (5'-ACAGGACCATGCACCATAGC-3'; 5'-GTGGCTCGGCACCTATAGAC-3'), VEGFR2 (5'-TCTGGACTCTCCCTGCCTAC-3'; 5'-ACACGGTGGTATCTGTGTCG-3'), and GAPDH (5'-ATCAAGAAGGTGGTGAAGCAGGCG-3'; 5'-GGGATGGAATTGTGAGGGAGATGCTC-3').
